# Supplementary material for: Expansion of disability across successive Mexican birth cohorts: a longitudinal modelling analysis of birth cohorts born 10 years apart
Source: PubMed Central journal article supplement — J Epidemiol Community Health. 2019 Jul 20;73(10):900–5. doi: 10.1136/jech-2019-212245 (PMC6817695; doi:10.1136/jech-2019-212245), 2019-07-20
Supplement: jech-2019-212245supp001.pdf [file jech-2019-212245supp001.pdf]

**SI Materials****Figure S1:** Lexis diagram for cohort DFLE, ages 50-59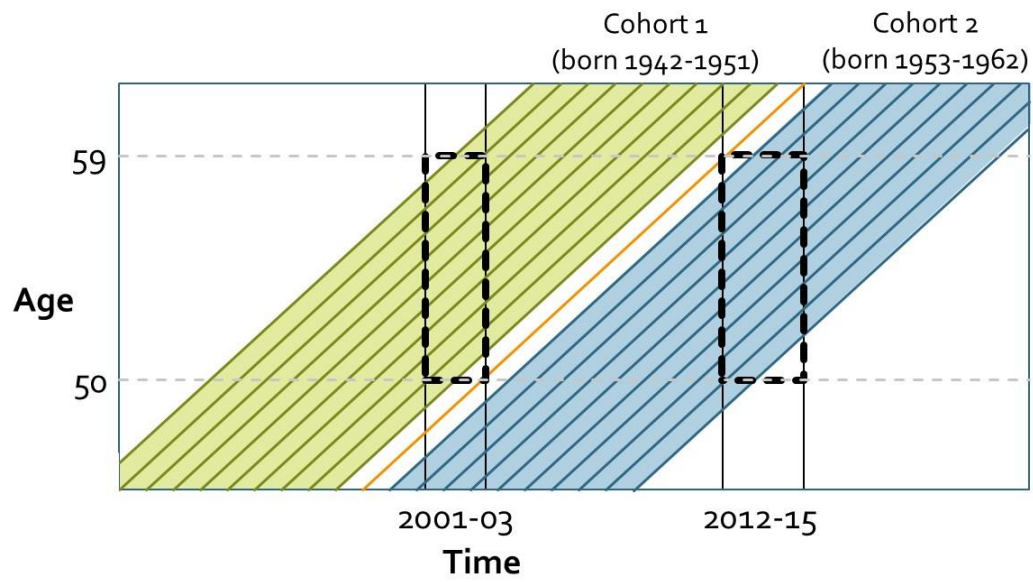

**Figure S2:** Proportion surviving to age 50, 60, and 70 by birth cohort, Mexican men and women

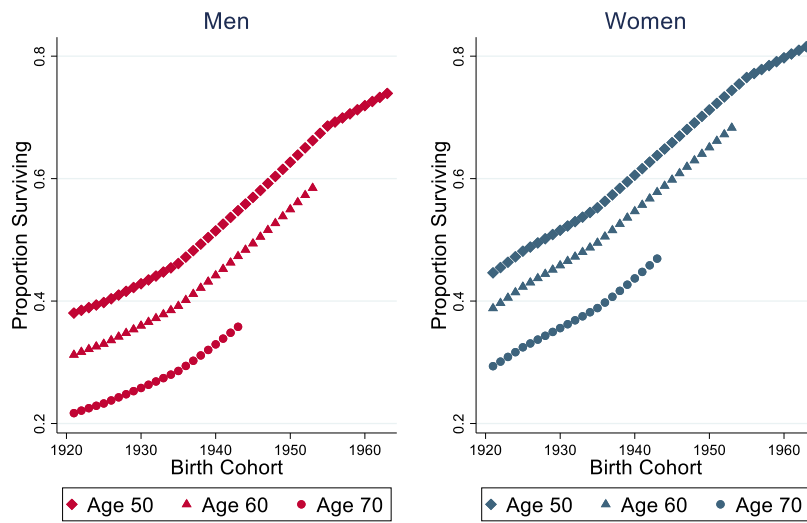

Source: Authors' analysis of data from the LAMbDa database (51)

**Table S1:** Sociodemographic and health characteristics of the MHAS 2001 and 2012 samples

|                                  | 2001  |       |       | 2012  |       |       |
|----------------------------------|-------|-------|-------|-------|-------|-------|
|                                  | 50-59 | 60-69 | 70-79 | 50-59 | 60-69 | 70-79 |
| Age                              |       |       |       |       |       |       |
| N                                | 6286  | 4120  | 2225  | 4698  | 5478  | 3203  |
| <i>Sex</i>                       |       |       |       |       |       |       |
| Male                             | 47%   | 46%   | 48%   | 38%   | 46%   | 46%   |
| Female                           | 53%   | 54%   | 52%   | 62%   | 54%   | 54%   |
| Currently married                | 78%   | 68%   | 54%   | 78%   | 74%   | 58%   |
| <i>Education</i>                 |       |       |       |       |       |       |
| No formal schooling              | 17%   | 28%   | 37%   | 9%    | 16%   | 27%   |
| 1-6 years                        | 54%   | 55%   | 51%   | 46%   | 54%   | 56%   |
| 7-11 years                       | 17%   | 11%   | 8%    | 26%   | 17%   | 11%   |
| 12+ years                        | 12%   | 6%    | 4%    | 19%   | 12%   | 6%    |
| Currently working                | 57%   | 40%   | 27%   | 56%   | 38%   | 20%   |
| Ever worked outside home         | 85%   | 81%   | 79%   | 81%   | 83%   | 81%   |
| <i>Physical health</i>           |       |       |       |       |       |       |
| Active                           | 57%   | 46%   | 35%   | 53%   | 42%   | 30%   |
| % with a physical limitation     | 39%   | 46%   | 50%   | 39%   | 45%   | 51%   |
| <i>Limitations</i>               |       |       |       |       |       |       |
| Walking a block                  | 5%    | 11%   | 20%   | 5%    | 11%   | 21%   |
| Sitting still for long periods   | 15%   | 19%   | 24%   | 15%   | 20%   | 23%   |
| Getting up from a chair          | 23%   | 29%   | 37%   | 24%   | 31%   | 35%   |
| Climbing a flight of stairs      | 13%   | 22%   | 35%   | 15%   | 23%   | 33%   |
| Kneeling or crouching            | 29%   | 40%   | 49%   | 32%   | 41%   | 52%   |
| Pushing or pulling heavy obj.    | 14%   | 21%   | 34%   | 16%   | 24%   | 33%   |
| Carrying 5kg bag                 | 12%   | 20%   | 31%   | 15%   | 23%   | 33%   |
| % with an ADL disability         | 5%    | 8%    | 15%   | 7%    | 13%   | 19%   |
| <i>ADL disabilities</i>          |       |       |       |       |       |       |
| Walking across a room            | 3%    | 6%    | 10%   | 5%    | 8%    | 15%   |
| Eating                           | 1%    | 2%    | 4%    | 2%    | 3%    | 6%    |
| Bathing                          | 1%    | 3%    | 6%    | 3%    | 5%    | 11%   |
| Transferring in/out of bed       | 4%    | 8%    | 10%   | 7%    | 8%    | 13%   |
| Toileting                        | 3%    | 5%    | 8%    | 4%    | 6%    | 10%   |
| <i>BMI</i>                       |       |       |       |       |       |       |
| Underweight (<18.5)              | 1%    | 2%    | 4%    | 1%    | 1%    | 2%    |
| Normal (≥18.5, <25)              | 29%   | 34%   | 42%   | 27%   | 30%   | 36%   |
| Overweight (≥25, <30)            | 42%   | 42%   | 37%   | 42%   | 42%   | 41%   |
| Obese (≥30)                      | 27%   | 22%   | 17%   | 30%   | 27%   | 20%   |
| <i>Cognitive status</i>          |       |       |       |       |       |       |
| Normal                           | 78%   | 67%   | 63%   | 88%   | 81%   | 80%   |
| Impaired                         | 23%   | 33%   | 38%   | 12%   | 19%   | 20%   |
| Ever a smoker                    | 44%   | 45%   | 48%   | 37%   | 38%   | 38%   |
| Visited physician in past 12 mo. | 62%   | 66%   | 68%   | 77%   | 83%   | 86%   |

*Physician-assessed chronic conditions*

|              |     |     |     |     |     |     |
|--------------|-----|-----|-----|-----|-----|-----|
| Hypertension | 34% | 43% | 42% | 34% | 46% | 52% |
| Diabetes     | 15% | 18% | 17% | 20% | 27% | 26% |
| Arthritis    | 16% | 23% | 27% | 9%  | 14% | 18% |

*Childhood conditions*

|                                    |     |     |     |     |     |     |
|------------------------------------|-----|-----|-----|-----|-----|-----|
| Toilet in house < age 10           | 39% | 30% | 25% | 39% | 37% | 29% |
| Serious childhood illness < age 10 | 11% | 11% | 11% | 10% | 10% | 11% |

Notes: ADL = Activities of daily living

**Table S2:** Total, active, limited, and ADL disabled life expectancy in ages 50-59, by initial disability state. Panel A: initially active; Panel B, initially limited, Panel C, initially ADL disabled

|                              | Age 50-59          |                    |       | P value of diff |
|------------------------------|--------------------|--------------------|-------|-----------------|
|                              | Birth Cohort       |                    | Diff  |                 |
|                              | 1942-1951          | 1953-1962          |       |                 |
| <b>A) Initially Active</b>   |                    |                    |       |                 |
| <b>Overall</b>               |                    |                    |       |                 |
| Total                        | 9.72 [9.65 - 9.78] | 9.72 [9.65 - 9.79] | 0.00  | 0.714           |
| Active                       | 7.17 [6.98 - 7.32] | 6.93 [6.65 - 7.17] | -0.24 | 0.042           |
| Limited                      | 2.31 [2.19 - 2.47] | 2.45 [2.26 - 2.67] | 0.14  | 0.138           |
| ADL disabled                 | 0.24 [0.19 - 0.3]  | 0.34 [0.27 - 0.42] | 0.10  | 0.002           |
| <b>Men</b>                   |                    |                    |       |                 |
| Total                        | 9.69 [9.58 - 9.77] | 9.79 [9.68 - 9.87] | 0.10  | 0.038           |
| Active                       | 7.47 [7.18 - 7.63] | 7.6 [7.22 - 7.92]  | 0.13  | 0.224           |
| Limited                      | 2.03 [1.88 - 2.26] | 1.88 [1.63 - 2.19] | -0.15 | 0.134           |
| ADL disabled                 | 0.2 [0.14 - 0.28]  | 0.31 [0.21 - 0.43] | 0.11  | 0.012           |
| <b>Women</b>                 |                    |                    |       |                 |
| Total                        | 9.76 [9.68 - 9.82] | 9.67 [9.57 - 9.76] | -0.09 | 0.058           |
| Active                       | 6.86 [6.62 - 7.08] | 6.32 [5.98 - 6.65] | -0.54 | <0.001          |
| Limited                      | 2.61 [2.43 - 2.82] | 2.97 [2.72 - 3.27] | 0.36  | 0.004           |
| ADL disabled                 | 0.29 [0.21 - 0.36] | 0.37 [0.28 - 0.48] | 0.08  | 0.028           |
| <b>B) Initially Limited</b>  |                    |                    |       |                 |
| <b>Overall</b>               |                    |                    |       |                 |
| Total                        | 9.63 [9.54 - 9.7]  | 9.47 [9.36 - 9.59] | -0.16 | <0.001          |
| Active                       | 4.03 [3.78 - 4.17] | 2.79 [2.54 - 3.08] | -1.24 | <0.001          |
| Limited                      | 5.3 [5.16 - 5.52]  | 6.14 [5.9 - 6.34]  | 0.84  | <0.001          |
| ADL disabled                 | 0.3 [0.24 - 0.36]  | 0.54 [0.43 - 0.67] | 0.24  | <0.001          |
| <b>Men</b>                   |                    |                    |       |                 |
| Total                        | 9.59 [9.41 - 9.69] | 9.51 [9.29 - 9.71] | -0.08 | 0.678           |
| Active                       | 4.4 [4 - 4.6]      | 3.74 [3.19 - 4.27] | -0.66 | 0.018           |
| Limited                      | 4.92 [4.72 - 5.27] | 5.34 [4.92 - 5.74] | 0.42  | 0.056           |
| ADL disabled                 | 0.27 [0.18 - 0.38] | 0.43 [0.29 - 0.66] | 0.16  | 0.01            |
| <b>Women</b>                 |                    |                    |       |                 |
| Total                        | 9.66 [9.56 - 9.75] | 9.45 [9.32 - 9.59] | -0.21 | <0.001          |
| Active                       | 3.82 [3.56 - 4.06] | 2.45 [2.17 - 2.79] | -1.37 | <0.001          |
| Limited                      | 5.51 [5.31 - 5.77] | 6.43 [6.14 - 6.68] | 0.92  | <0.001          |
| ADL disabled                 | 0.32 [0.24 - 0.39] | 0.58 [0.43 - 0.73] | 0.26  | <0.001          |
| <b>C) Initially Disabled</b> |                    |                    |       |                 |
| <b>Overall</b>               |                    |                    |       |                 |
| Total                        | 9.31 [8.94 - 9.6]  | 9.35 [9.1 - 9.58]  | 0.04  | 0.786           |
| Active                       | 3.40 [3.01 - 3.99] | 2.07 [1.76 - 2.56] | -1.33 | <0.001          |
| Limited                      | 2.73 [2.44 - 3.04] | 3.33 [3.1 - 3.87]  | 0.60  | <0.001          |
| ADL disabled                 | 3.19 [2.67 - 3.51] | 3.95 [3.19 - 4.35] | 0.76  | 0.006           |
| <b>Men</b>                   |                    |                    |       |                 |
| Total                        | 9.00 [8.04 - 9.63] | 9.24 [8.57 - 9.68] | 0.24  | 0.438           |
| Active                       | 3.44 [2.44 - 4.55] | 2.54 [1.65 - 3.42] | -0.90 | 0.066           |
| Limited                      | 2.02 [1.54 - 2.62] | 2.95 [2.25 - 3.72] | 0.93  | 0.012           |
| ADL disabled                 | 3.54 [2.6 - 4.18]  | 3.75 [2.7 - 4.85]  | 0.21  | 0.55            |
| <b>Women</b>                 |                    |                    |       |                 |
| Total                        | 9.49 [9.21 - 9.74] | 9.38 [9.11 - 9.63] | -0.11 | 0.432           |
| Active                       | 3.37 [3.02 - 3.94] | 1.91 [1.61 - 2.48] | -1.46 | <0.001          |
| Limited                      | 3.13 [2.81 - 3.44] | 3.46 [3.15 - 4.09] | 0.33  | 0.024           |
| ADL disabled                 | 2.98 [2.47 - 3.34] | 4.01 [3.16 - 4.44] | 1.03  | 0.004           |
| Period observed              | 2001-2003          | 2012-2015          |       |                 |

Diff, difference; ADL, activities of daily living. Data are life expectancy in years unless specified, with the 95% confidence interval in brackets after point estimate. Models adjusted for age and sex (only for overall).

**Table S3:** Total, active, limited, and ADL disabled life expectancy in ages 60-69, by initial disability state. Panel A: initially active; Panel B, initially limited, Panel C, initially ADL disabled

|                              | Age 60-69          |                    |       | P value of diff |
|------------------------------|--------------------|--------------------|-------|-----------------|
|                              | Birth Cohort       |                    | Diff  |                 |
|                              | 1932-1941          | 1943-1952          |       |                 |
| <b>A) Initially Active</b>   |                    |                    |       |                 |
| <b>Overall</b>               |                    |                    |       |                 |
| Total                        | 9.27 [9.14 - 9.39] | 9.28 [9.16 - 9.38] | 0.01  | 0.844           |
| Active                       | 6.4 [6.18 - 6.59]  | 6.19 [5.89 - 6.43] | -0.21 | 0.066           |
| Limited                      | 2.52 [2.37 - 2.71] | 2.55 [2.36 - 2.76] | 0.03  | 0.732           |
| ADL disabled                 | 0.35 [0.28 - 0.43] | 0.54 [0.47 - 0.63] | 0.19  | <0.001          |
| <b>Men</b>                   |                    |                    |       |                 |
| Total                        | 9.23 [9.06 - 9.4]  | 9.21 [9.04 - 9.36] | -0.02 | 0.716           |
| Active                       | 6.85 [6.52 - 7.12] | 6.65 [6.2 - 6.96]  | -0.20 | 0.216           |
| Limited                      | 2.15 [1.95 - 2.42] | 2.1 [1.89 - 2.38]  | -0.05 | 0.702           |
| ADL disabled                 | 0.23 [0.16 - 0.32] | 0.46 [0.36 - 0.6]  | 0.23  | <0.001          |
| <b>Women</b>                 |                    |                    |       |                 |
| Total                        | 9.33 [9.15 - 9.46] | 9.37 [9.25 - 9.49] | 0.04  | 0.344           |
| Active                       | 5.89 [5.58 - 6.17] | 5.61 [5.27 - 5.96] | -0.28 | 0.09            |
| Limited                      | 2.95 [2.71 - 3.18] | 3.12 [2.82 - 3.4]  | 0.17  | 0.188           |
| ADL disabled                 | 0.48 [0.38 - 0.59] | 0.64 [0.54 - 0.77] | 0.16  | <0.001          |
| <b>B) Initially Limited</b>  |                    |                    |       |                 |
| <b>Overall</b>               |                    |                    |       |                 |
| Total                        | 9.06 [8.94 - 9.2]  | 9.06 [8.94 - 9.16] | 0.00  | 0.788           |
| Active                       | 3.29 [3.13 - 3.54] | 1.97 [1.74 - 2.19] | -1.32 | <0.001          |
| Limited                      | 5.29 [5.08 - 5.43] | 6.32 [6.14 - 6.51] | 1.03  | <0.001          |
| ADL disabled                 | 0.48 [0.39 - 0.57] | 0.77 [0.66 - 0.87] | 0.29  | <0.001          |
| <b>Men</b>                   |                    |                    |       |                 |
| Total                        | 9.01 [8.77 - 9.2]  | 8.94 [8.73 - 9.13] | -0.06 | 0.604           |
| Active                       | 3.8 [3.51 - 4.19]  | 2.65 [2.27 - 3.08] | -1.15 | <0.001          |
| Limited                      | 4.84 [4.54 - 5.09] | 5.67 [5.4 - 5.97]  | 0.83  | <0.001          |
| ADL disabled                 | 0.36 [0.25 - 0.48] | 0.63 [0.47 - 0.77] | 0.27  | <0.001          |
| <b>Women</b>                 |                    |                    |       |                 |
| Total                        | 9.11 [8.95 - 9.28] | 9.12 [8.98 - 9.24] | 0.01  | 0.962           |
| Active                       | 2.94 [2.74 - 3.27] | 1.57 [1.35 - 1.79] | -1.37 | <0.001          |
| Limited                      | 5.59 [5.33 - 5.8]  | 6.71 [6.46 - 6.91] | 1.12  | <0.001          |
| ADL disabled                 | 0.57 [0.45 - 0.68] | 0.85 [0.72 - 0.99] | 0.28  | <0.001          |
| <b>C) Initially Disabled</b> |                    |                    |       |                 |
| <b>Overall</b>               |                    |                    |       |                 |
| Total                        | 8.53 [8.05 - 8.88] | 8.79 [8.64 - 9.06] | 0.26  | 0.04            |
| Active                       | 2.3 [1.91 - 2.69]  | 1.17 [1.06 - 1.52] | -1.13 | <0.001          |
| Limited                      | 2.76 [2.38 - 3.12] | 2.8 [2.55 - 3.21]  | 0.04  | 0.42            |
| ADL disabled                 | 3.47 [3.1 - 3.79]  | 4.82 [4.35 - 5.07] | 1.35  | <0.001          |
| <b>Men</b>                   |                    |                    |       |                 |
| Total                        | 8.64 [7.65 - 9.04] | 8.47 [8.16 - 9.01] | -0.17 | 0.582           |
| Active                       | 2.68 [1.9 - 3.14]  | 1.51 [1.3 - 2.32]  | -1.17 | 0.008           |
| Limited                      | 2.62 [1.97 - 3.07] | 2.24 [1.92 - 2.87] | -0.38 | 0.546           |
| ADL disabled                 | 3.34 [2.85 - 4.08] | 4.72 [3.89 - 5.07] | 1.38  | <0.001          |
| <b>Women</b>                 |                    |                    |       |                 |
| Total                        | 8.47 [7.96 - 9.02] | 8.95 [8.72 - 9.16] | 0.48  | 0.038           |
| Active                       | 2.09 [1.76 - 2.64] | 1.01 [0.83 - 1.29] | -1.08 | <0.001          |
| Limited                      | 2.83 [2.4 - 3.35]  | 3.06 [2.7 - 3.51]  | 0.23  | 0.228           |
| ADL disabled                 | 3.54 [3.05 - 3.92] | 4.88 [4.34 - 5.26] | 1.34  | <0.001          |
| Period observed              | 2001-2003          | 2012-2015          |       |                 |

Diff, difference; ADL, activities of daily living. Data are life expectancy in years unless specified, with the 95% confidence interval in brackets after point estimate. Models adjusted for age and sex (only for overall).

**Table S4:** Total, active, limited, and ADL disabled life expectancy in ages 70-79, by initial disability state. Panel A: initially active; Panel B, initially limited, Panel C, initially ADL disabled

|                              | Age 70-79          |                    |       | P value of diff |
|------------------------------|--------------------|--------------------|-------|-----------------|
|                              | Birth Cohort       |                    | Diff  |                 |
|                              | 1922-1931          | 1933-1942          |       |                 |
| <b>A) Initially Active</b>   |                    |                    |       |                 |
| <b>Overall</b>               |                    |                    |       |                 |
| Total                        | 8.68 [8.5 - 8.91]  | 8.83 [8.61 - 8.96] | 0.15  | 0.318           |
| Active                       | 5.6 [5.3 - 5.91]   | 5.87 [5.43 - 6.05] | 0.27  | 0.362           |
| Limited                      | 2.5 [2.27 - 2.73]  | 2.3 [2.12 - 2.61]  | -0.20 | 0.18            |
| ADL disabled                 | 0.58 [0.45 - 0.7]  | 0.66 [0.56 - 0.8]  | 0.08  | 0.074           |
| <b>Men</b>                   |                    |                    |       |                 |
| Total                        | 8.64 [8.37 - 8.94] | 8.76 [8.45 - 8.94] | 0.12  | 0.782           |
| Active                       | 5.95 [5.6 - 6.4]   | 6.21 [5.73 - 6.52] | 0.26  | 0.494           |
| Limited                      | 2.2 [1.91 - 2.48]  | 2.01 [1.73 - 2.37] | -0.19 | 0.278           |
| ADL disabled                 | 0.48 [0.34 - 0.61] | 0.53 [0.4 - 0.68]  | 0.05  | 0.39            |
| <b>Women</b>                 |                    |                    |       |                 |
| Total                        | 8.73 [8.42 - 9.01] | 8.95 [8.69 - 9.11] | 0.22  | 0.172           |
| Active                       | 5.09 [4.64 - 5.47] | 5.38 [4.71 - 5.67] | 0.29  | 0.526           |
| Limited                      | 2.92 [2.58 - 3.37] | 2.72 [2.45 - 3.17] | -0.20 | 0.456           |
| ADL disabled                 | 0.71 [0.51 - 0.95] | 0.84 [0.71 - 1.09] | 0.13  | 0.086           |
| <b>B) Initially Limited</b>  |                    |                    |       |                 |
| <b>Overall</b>               |                    |                    |       |                 |
| Total                        | 8.39 [8.16 - 8.63] | 8.42 [8.24 - 8.59] | 0.03  | 0.804           |
| Active                       | 2.42 [2.11 - 2.67] | 1.15 [0.97 - 1.32] | -1.27 | <0.001          |
| Limited                      | 5.21 [4.98 - 5.48] | 6.28 [6.03 - 6.49] | 1.07  | <0.001          |
| ADL disabled                 | 0.76 [0.61 - 0.89] | 1.00 [0.88 - 1.16] | 0.24  | 0.002           |
| <b>Men</b>                   |                    |                    |       |                 |
| Total                        | 8.37 [8.03 - 8.68] | 8.27 [8.01 - 8.54] | -0.10 | 0.634           |
| Active                       | 3.05 [2.6 - 3.5]   | 1.42 [1.14 - 1.74] | -1.63 | <0.001          |
| Limited                      | 4.69 [4.37 - 5.04] | 5.99 [5.68 - 6.32] | 1.30  | <0.001          |
| ADL disabled                 | 0.63 [0.47 - 0.81] | 0.86 [0.67 - 1.04] | 0.23  | 0.018           |
| <b>Women</b>                 |                    |                    |       |                 |
| Total                        | 8.41 [8.12 - 8.71] | 8.54 [8.3 - 8.71]  | 0.13  | 0.256           |
| Active                       | 1.96 [1.62 - 2.28] | 0.95 [0.73 - 1.14] | -1.01 | <0.001          |
| Limited                      | 5.6 [5.27 - 6.03]  | 6.48 [6.15 - 6.73] | 0.88  | <0.001          |
| ADL disabled                 | 0.85 [0.65 - 1.05] | 1.1 [0.95 - 1.35]  | 0.25  | 0.005           |
| <b>C) Initially Disabled</b> |                    |                    |       |                 |
| <b>Overall</b>               |                    |                    |       |                 |
| Total                        | 7.68 [7.21 - 8.19] | 8.02 [7.78 - 8.32] | 0.34  | 0.086           |
| Active                       | 1.31 [1.03 - 1.67] | 0.5 [0.39 - 0.68]  | -0.81 | <0.001          |
| Limited                      | 2.27 [1.91 - 2.65] | 2.26 [1.9 - 2.57]  | -0.01 | 0.784           |
| ADL disabled                 | 4.11 [3.71 - 4.49] | 5.26 [4.97 - 5.65] | 1.15  | <0.001          |
| <b>Men</b>                   |                    |                    |       |                 |
| Total                        | 7.04 [6.02 - 7.93] | 7.87 [7.4 - 8.36]  | 0.83  | 0.012           |
| Active                       | 1.4 [0.91 - 2.08]  | 0.75 [0.54 - 1.17] | -0.65 | 0.005           |
| Limited                      | 1.79 [1.27 - 2.35] | 2.23 [1.74 - 2.73] | 0.44  | 0.049           |
| ADL disabled                 | 3.85 [3.35 - 4.34] | 4.89 [4.37 - 5.36] | 1.04  | <0.001          |
| <b>Women</b>                 |                    |                    |       |                 |
| Total                        | 8.09 [7.56 - 8.61] | 8.1 [7.78 - 8.45]  | 0.01  | 0.48            |
| Active                       | 1.25 [0.94 - 1.59] | 0.37 [0.24 - 0.49] | -0.88 | <0.001          |
| Limited                      | 2.57 [2.07 - 3.11] | 2.28 [1.83 - 2.69] | -0.29 | 0.069           |
| ADL disabled                 | 4.27 [3.8 - 4.87]  | 5.46 [5.12 - 5.98] | 1.19  | <0.001          |
| Period observed              | 2001-2003          | 2012-2015          |       |                 |

Diff, difference; ADL, activities of daily living. Data are life expectancy in years unless specified, with the 95% confidence interval in brackets after point estimate. Models adjusted for age and sex (only for overall).
